# Supplementary material for: Photocatalytic degradation of polybrominated biphenyls (PBBs) on metal doped TiO2 nanocomposites in aqueous environments: mechanisms and solution effects
Source: Royal Society of Chemistry journal article supplement (doi:10.1039/c8en01309h), 2019-01-01
Supplement: c8en01309h1.pdf [file c8en01309h1.pdf]

## **SUPPLEMENTARY DATA**

### **Photocatalytic degradation of polybrominated biphenyls (PBBs) on metal doped TiO<sub>2</sub> nanocomposites in aqueous environment: Mechanisms and solution effects**

Rui Wang, Ting Tang, Guining Lu, Kaibo Huang, Siyuan Feng, Xin Zhang, Xueqin

Tao, Hua Yin, Zhang Lin, Zhi Dang,

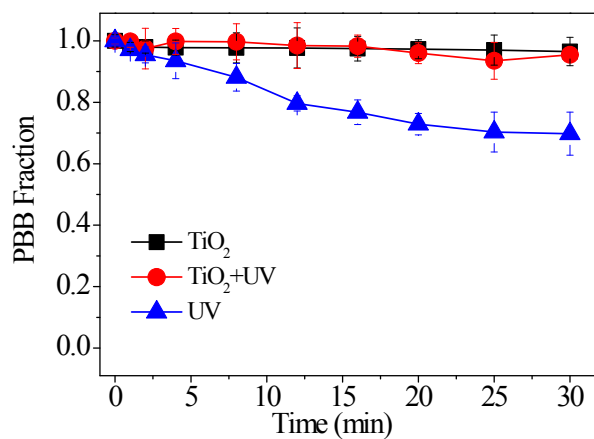

**Fig. S1.** The degradation of PBB-29 by direct UV light, TiO<sub>2</sub> only, and TiO<sub>2</sub> with UV light.

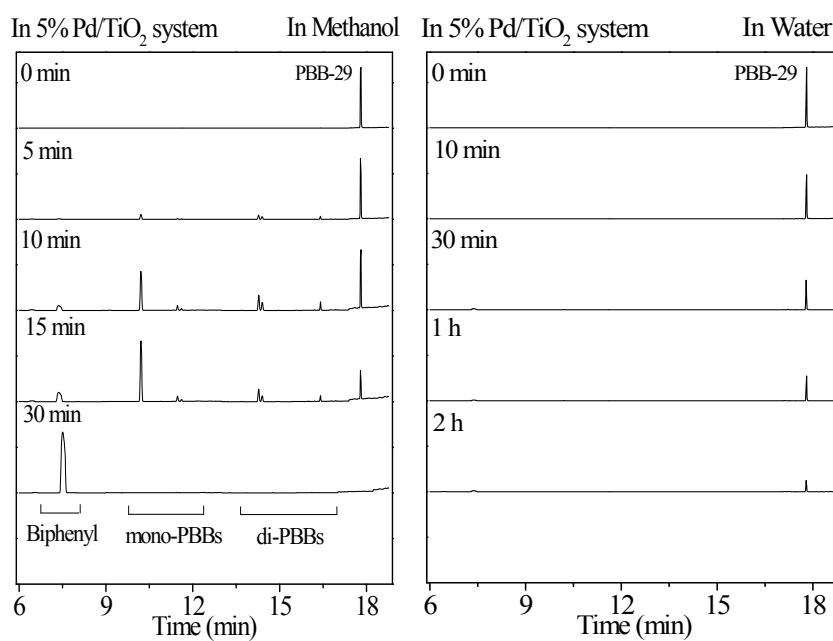

**Fig.S2** The chromatograms of the degradation of PBB-29 in 5% Pd/TiO<sub>2</sub> systems with methanol and water solutions.

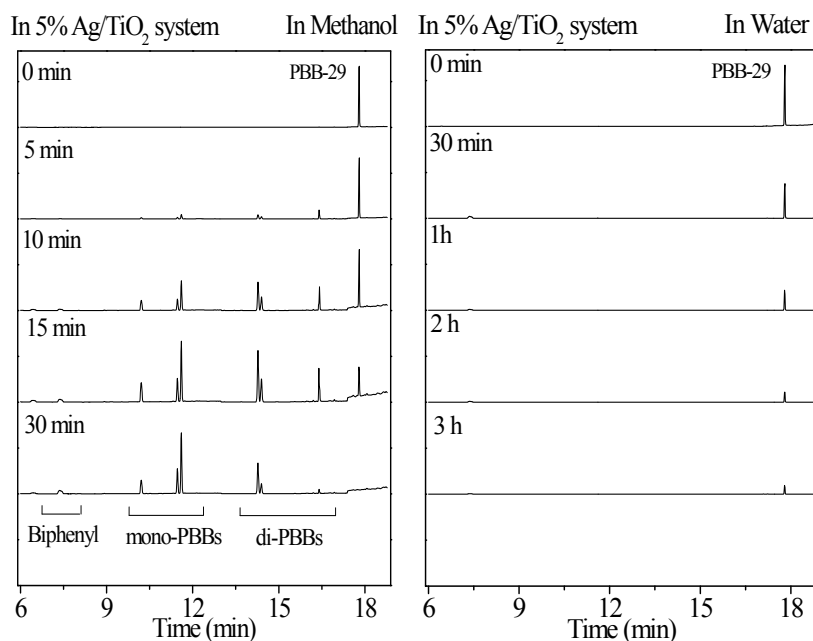

**Fig. S3.** The chromatograms of the degradation of PBB-29 in 5% Ag/TiO<sub>2</sub> systems with methanol and water solutions.

**Note for Fig. S3:** Since the degradation of PBBs in methanol systems only underwent debromination process, we have calculated the debromination efficiency of PBBs based on the equation below:

$$\text{Debromination efficiency } (t) = \frac{C_{\text{biphenyl}, t} \times 3 + C_{\text{monoPBB}, t} \times 2 + C_{\text{diPBB}, t} \times 1}{C_{\text{PBB-29}, 0 \text{ min}} \times 3}$$

Where  $C_{\text{PBB-29}, 0 \text{ min}}$  is the initial concentration of PBB-29,  $C_{\text{biphenyl/monoPBB/diPBB}, t}$  refers to the concentration of certain PBBs at  $t$  min. All the concentration should be converted into molar fraction. In 30 min, PBB-29 in 5% Pd/TiO<sub>2</sub> systems can reach to 100% debromination efficiency (Fig. S2), while that in 5% Ag/TiO<sub>2</sub> systems can only reach to 53 % (Fig. S3). This is because the lower PBBs by e-transfer process is more difficult to be debrominated than the higher PBBs (See our discussion about LUMO in main text).

**Table S1.** The energies of highest occupied molecular orbitals (HOMO) and lowest

unoccupied molecular orbitals (LUMO) of PBB-29, PBB-7 and PBB-3.

| Name   | HOMO (eV) | LUMO (eV) |
|--------|-----------|-----------|
| PBB-29 | -0.2546   | -0.0540   |
| PBB-7  | -0.2521   | -0.0468   |
| PBB-3  | -0.2430   | -0.0466   |

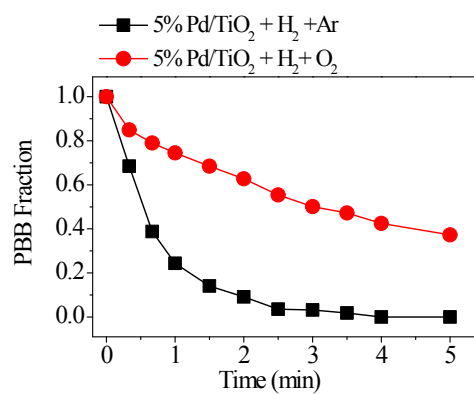

**Fig. S4.** The degradation of PBB-29 in Pd/TiO<sub>2</sub>-H<sub>2</sub> system with Ar or O<sub>2</sub> purging.

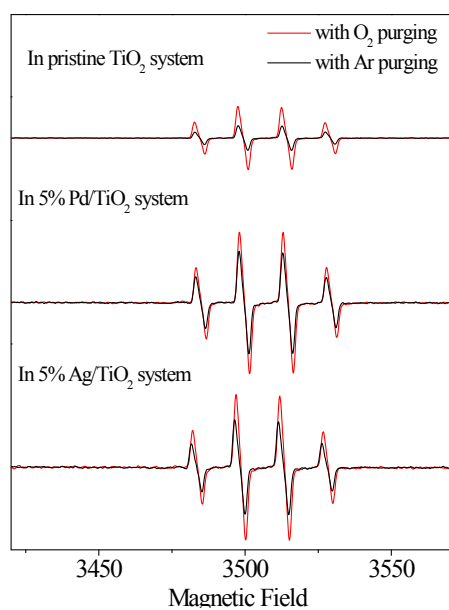

**Fig. S5.** Electron paramagnetic resonance spectra of pristine TiO<sub>2</sub>, Pd/TiO<sub>2</sub> and Ag/TiO<sub>2</sub> in water with O<sub>2</sub> or Ar purging.
